# Supplementary material for: NiII-containing l-glutamic acid cross-linked chitosan anchored on Fe3O4/f-MWCNT: a sustainable catalyst for the green reduction and one-pot two-step reductive Schotten–Baumann-type acetylation of nitroarenes
Source: Royal Society of Chemistry journal article supplement (doi:10.1039/d4na00160e), 2024-01-01
Supplement: d4na00160e1.pdf [file d4na00160e1.pdf]

# Supplementary information

## **Ni<sup>II</sup>-Containing L-glutamic acid cross-linked chitosan anchored on Fe<sub>3</sub>O<sub>4</sub>/f-MWCNT: A sustainable catalyst for the green reduction and one-pot two-step reductive Schotten–Baumann-type acetylation of nitroarenes**

Hossein Mousavi\*, Behzad Zeynizadeh and Morteza Hasanpour Galehban

*Department of Organic Chemistry, Faculty of Chemistry, Urmia University, Urmia, Iran.*

E-mail: [1hossein.mousavi@gmail.com](mailto:1hossein.mousavi@gmail.com)

### **S1. Experimental**

#### **S1.1. Preparation of the hybrid Fe<sub>3</sub>O<sub>4</sub>/f-MWCNT-CS-Glu/Ni<sup>II</sup> nanocomposite**

The hybrid Fe<sub>3</sub>O<sub>4</sub>/f-MWCNT-CS-Glu/Ni<sup>II</sup> nanocomposite was prepared accurately through our previous research paper.<sup>11</sup>

#### **S1.2. General procedure for the reduction of nitroarenes to aryl amines catalyzed by the as-prepared Fe<sub>3</sub>O<sub>4</sub>/f-MWCNT-CS-Glu/Ni<sup>II</sup> nanocomposite**

As a representative example, in a round-bottom flask (10 mL) equipped with a magnetic stirrer, a mixture of PhNO<sub>2</sub> (1 mmol) and H<sub>2</sub>O (3 mL) was prepared. Then, 5 mg of the as-prepared Fe<sub>3</sub>O<sub>4</sub>/f-MWCNT-CS-Glu/Ni<sup>II</sup> nanocomposite was added, and the mixture was stirred. At the next step, NaBH<sub>4</sub> (2 mmol) was added, and the resulting mixture was continuously stirred at 60 °C for four minutes. After the completion of the reaction, the mentioned Ni<sup>II</sup>-containing catalytic system was separated from the reaction pot using an external magnet. The reaction mixture was extracted with ethyl acetate (EtOAc) (2 × 5 mL) and then dried over anhydrous sodium sulfate (Na<sub>2</sub>SO<sub>4</sub>). Lastly, the solvent was evaporated under reduced pressure to afford the pure liquid aniline in 98% yield.

##### **S1.2.1. Aniline**

FT-IR (KBr)  $\nu_{\max}$  3430, 3356, 3216, 3071, 2924, 2854, 2768, 1618, 1497, 1276, 1173, 1052, 994, 754, 690, 501 cm<sup>-1</sup>; <sup>1</sup>H NMR (300 MHz, CDCl<sub>3</sub>)  $\delta_{\text{H}}$  7.28–7.16 (m, 2H, –Ph), 6.83–6.70 (m, 2H, –Ph), 3.60 (s, 2H, –NH<sub>2</sub>); <sup>13</sup>C NMR (75 MHz, CDCl<sub>3</sub>)  $\delta_{\text{C}}$  146.34, 129.31, 118.60, 115.16.

#### **S1.3. General procedure for the one-pot two-step reductive Schotten–Baumann-type acetylation of nitroarenes catalyzed by Fe<sub>3</sub>O<sub>4</sub>/f-MWCNT-CS-Glu/Ni<sup>II</sup> nanocomposite**

As an example, in a round-bottom flask (10 mL) equipped with a magnetic stirrer, a mixture of PhNO<sub>2</sub> (1 mmol) and H<sub>2</sub>O (3 mL) was prepared, and then, 5 mg of the as-prepared Fe<sub>3</sub>O<sub>4</sub>/f-MWCNT-CS-Glu/Ni<sup>II</sup> nanocomposite was added, and the mixture was stirred. At the next step, NaBH<sub>4</sub> (2 mmol) was added, and the resulting mixture was continuously stirred at 60 °C for four minutes. After completion of the reduction step, acetic anhydride (Ac<sub>2</sub>O) (1 mmol) was added to the reaction mixture, followed by stirring for further one minute at the same temperature conditions. After the completion of the acetylation reaction, the mentioned Ni<sup>II</sup>-containing catalytic system was separated from the reaction pot using an external magnet. The reaction

mixture was extracted with ethyl acetate (EtOAc) ( $2 \times 5$  mL) and then dried over anhydrous sodium sulfate ( $\text{Na}_2\text{SO}_4$ ). Lastly, the solvent was evaporated under reduced pressure to afford the pure acetanilide in 97% yield.

### S1.3.1. *N*-phenylacetamide

FT-IR (KBr)  $\nu_{\text{max}}$  3299, 3195, 3128, 2927, 1663, 1605, 1521, 1380, 1310, 1255, 1021, 815, 750, 610, 499  $\text{cm}^{-1}$ ;  $^1\text{H}$  NMR (300 MHz,  $\text{CDCl}_3$ )  $\delta_{\text{H}}$  7.52 (s, 1H,  $-\text{NH}-$ ), 7.49–7.27 (m, 4H, Ph), 7.11 (t,  $J = 7.2$  Hz, 1H, Ph), 2.18 (s, 3H,  $-\text{CH}_3$ ).
